# Supplementary material
Source: PubMed Central journal article supplement (PMC4601663)
Supplement: embj0034-2424-sd1.pdf [file embj0034-2424-sd1.pdf]

# Appendix

## Table of contents

Appendix figure S1

Appendix figure S2

Appendix figure S3

Appendix figure S4

Appendix figure S5

Appendix figure S6

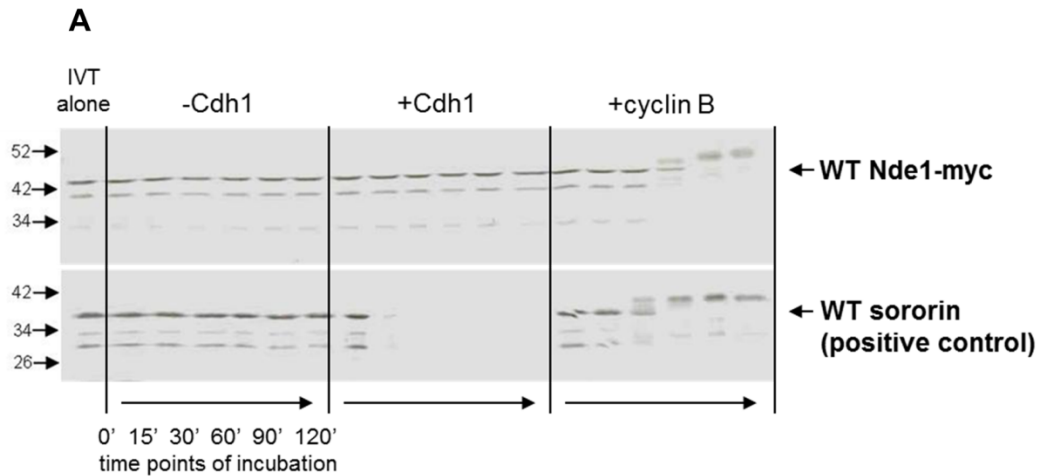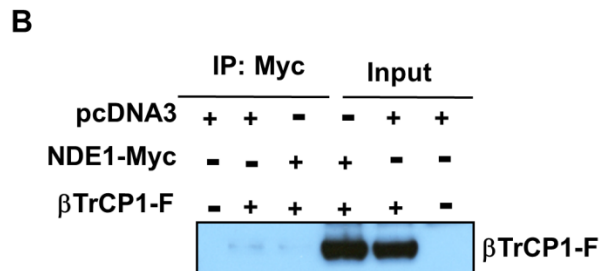

**Appendix figure S1. NDE1 is not a substrate for APC/C-Cdh1 or  $\beta$ -TrCP1 targeted degradation.**

**(A)** In vitro-translated  $^{35}$ S-labeled mouse NDE1 or Sororin (positive control) were added to interphase egg extract supplemented with or without recombinant Cdh1 (+Cdh1 or -Cdh1), or with recombinant non-degradable cyclin B (+CycB) to drive the extract into mitosis. Samples were collected at 0, 15, 30, 60, 90, and 120 minutes and analyzed by SDS-PAGE.

**(B)** HEK293T cells were transfected with pcDNA3 (lane 1), Flag-tagged  $\beta$ -TrCP1 (F- $\beta$ -TrCP1, lane 2), or NDE1-myc plus F- $\beta$ -TrCP1 (lane 3). NDE1-myc was immunoprecipitated with  $\alpha$ -Myc and complexes were immunoblotted with  $\alpha$ -Flag. Expression of F- $\beta$ -TrCP1 in whole cell lysates is shown in lanes 4-6.

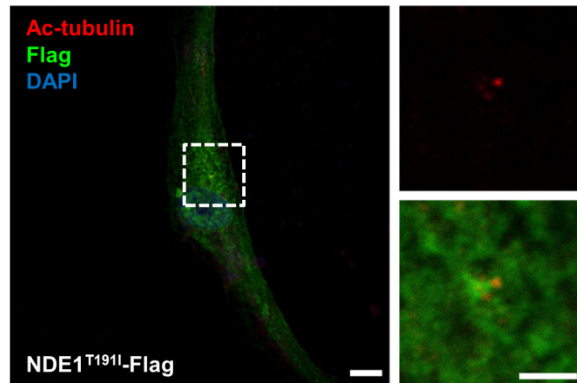

**Appendix figure S2. Transfected Flag-tagged NDE1<sup>T191I</sup> accumulates at the basal body and suppresses ciliary length.**

RPE1-hTERT cells were transfected with Flag-tagged NDE1<sup>T191I</sup> (NDE1<sup>T191I</sup>-Flag) or 48 h and serum-starved for 24 h following transfection to allow cilia formation. Cilia were visualized using a mouse monoclonal antibody (611B) against acetylated tubulin (shown in red), whereas NDE1 was labeled by rabbit  $\alpha$ -Flag (shown in green). Scale bar: 5  $\mu$ m.

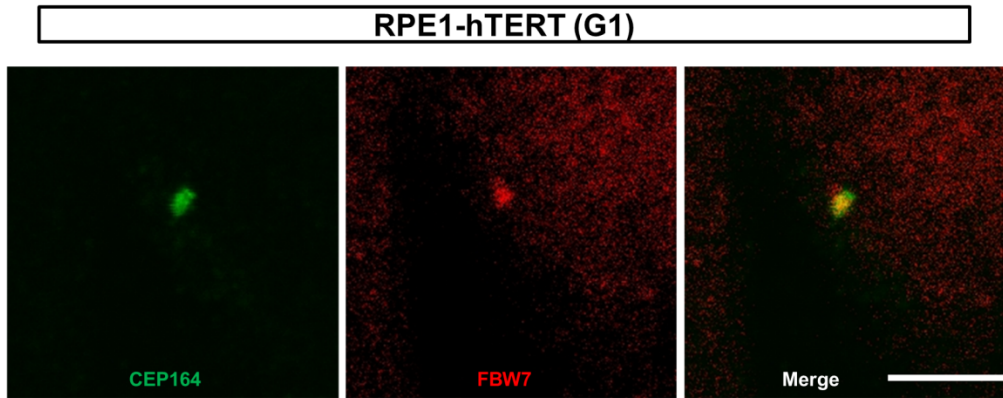

**Appendix figure S3. FBW7 co-localizes with CEP164.** RPE1-hTERT cells were serum-starved for 24h and stained with mouse  $\alpha$ -FBW7 (red) and rabbit  $\alpha$ -CEP164 (green). Scale bar: 10  $\mu$ m.

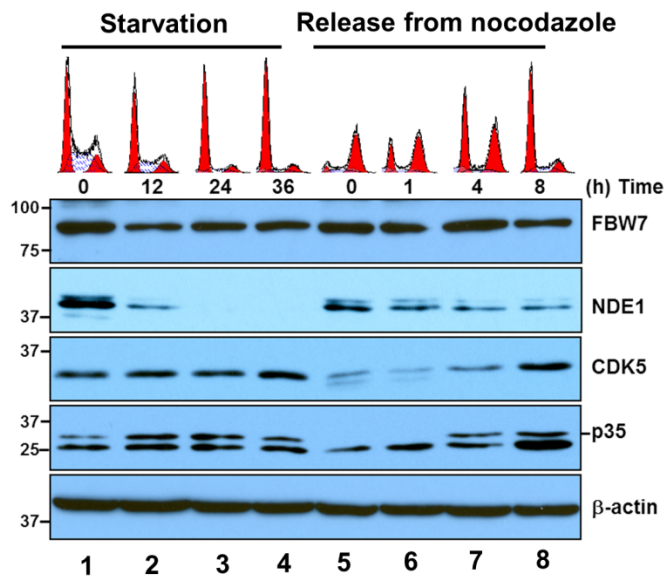

**Appendix figure S4. NDE1 and CDK5 are reciprocally expressed in cycling cells.**

NDE1 levels are reduced, whereas CDK5, and p35 levels are increased when cells are synchronized at G0/G1 or transit from mitosis to G1. BALB/C 3T3 cells were serum-starved for the indicated time points (lanes 1-4) or arrested in G2/M by nocodazole treatment 200 ng/ml for 18 h and then released in media containing 10% FBS to enter G1 (lanes 5-8). Whole cell lysates were prepared at the indicated time points following serum starvation or release from nocodazole and probed with FBW7, NDE1, CDK5, p35 or β-actin. Cell cycle profiles at all time-points were obtained by flow cytometry.

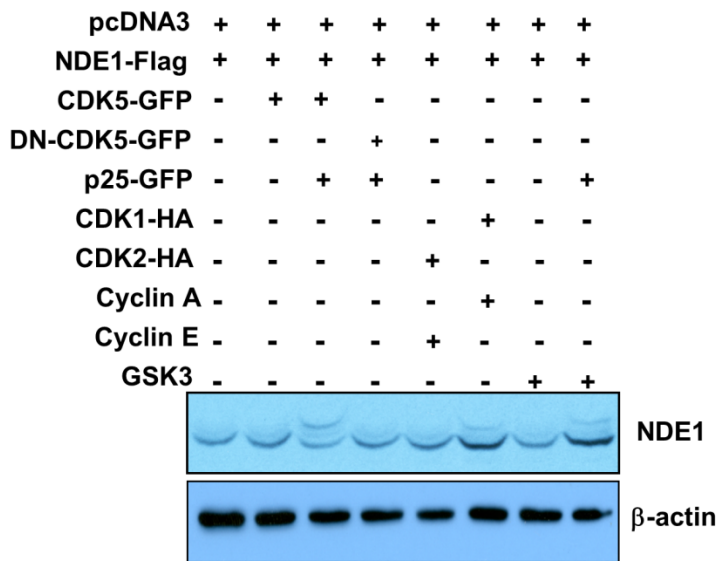

**Appendix figure S5. Activated CDK5 phosphorylates NDE1.**

HEK293T cells were transfected with indicated plasmids, total cell lysates were separated in SDS PAGE containing 50  $\mu$ M Phos-tag<sup>TM</sup> reagent and immunoblotted using  $\alpha$ -NDE1.

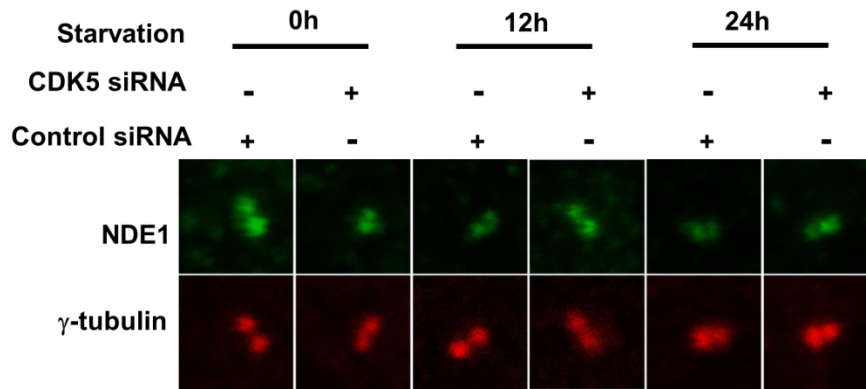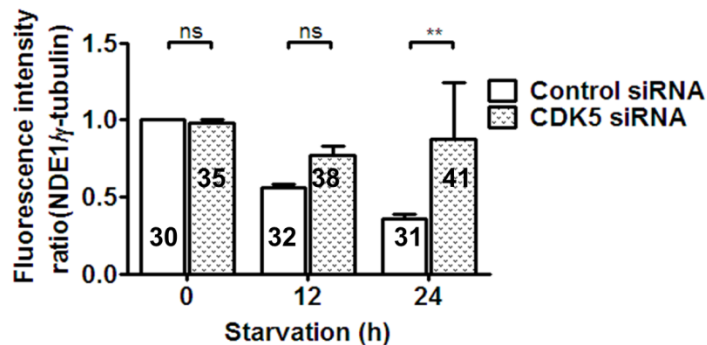

**Appendix figure S6. Depletion of CDK5 minimizes downregulation of NDE1 at the centrosome/basal body of resting cells.** Quantification of fluorescence intensity ratio of NDE1/ $\gamma$ -tubulin (green/red) signals at the centrosome at 0, 12 and 24 h serum starved of transfected cells with a scrambled (control) or CDK5-specific siRNA (CDK5 siRNA#1) as indicated. The range of fluorescence intensity per pixel in a box was 0-255 (total number of cells from 3 independent transfections is indicated on graph). Data represent mean  $\pm$  SEM. One way ANOVA followed by Newman-Keuls post-test was used to determine significant difference among groups. \*\*:  $p < 0.01$ , ns indicates no significance.
